# Supplementary material for: Unrecognised Ant Megadiversity in Monsoonal Australia: The Tetramorium spininode Bolton Group in the Northern Territory
Source: MDPI journal article supplement (doi:10.3390/d15040476), 2023-03-24

| Species          | BOLD ID       | Locality                        |
|------------------|---------------|---------------------------------|
| <i>spininode</i> | OZBOL 6501-22 | Windjana Gorge, Kimberly, WA    |
| sp. 1            | OZBOL 3952-21 | Forrest Hill Stn, Manbulloo Stn |
|                  | OZBOL 3953-21 | Hayfield Shenandoah Stn         |
| sp. 3            | OZBOL 3954-21 | Hayfield Shenandoah Stn         |
|                  | OZBOL 8189-22 | Hayfield Shenandoah Stn         |
| sp. 4            | TET 095-17    | Lorella Springs                 |
|                  | OZBOL 3955-21 | Hayfield Shenandoah Stn         |
|                  | OZBOL 3960-21 | Hayfield Shenandoah Stn         |
|                  | OZBOL 8101-22 | Shenandoah Stn                  |
|                  | OZBOL 8102-22 | Shenandoah Stn                  |
| sp. 5            | OZBOL 8222-22 | Newcastle Waters Stn            |
|                  | OZBOL 8223-22 | Newcastle Waters Stn            |
|                  | OZBOL 8227-22 | Tandidgee Stn                   |
|                  | OZBOL 8229-22 | Tandidgee Stn                   |
|                  | TET 077-17    | Newcastle Waters Stn            |
|                  | TET 078-17    | Lake Woods                      |
| sp. 10           | TET 090-17    | Nitmiluk NP                     |
|                  | OZBOL 3950-21 | Forrest Hill Stn                |
| sp. 11           | OZBOL 8187-22 | Forrest Hill Stn                |
|                  | OZBOL 8188-22 | Forrest Hill Stn                |
| sp. 13           | OZBOL 8203-22 | Manbulloo Stn                   |
| sp. 14           | TET 082-17    | Kakadu NP                       |
|                  | TET 088-17    | Kakadu NP                       |
| sp. 16           | TET 075-17    | Nitmiluk NP                     |
| sp. 18           | TET 081-17    | Kakadu NP                       |
| sp. 19           | TET 087-17    | Gove Peninsula                  |
| sp. 20           | TET 086-17    | Kakadu NP                       |
|                  | OZBOL 1855-21 | Kakadu NP                       |
|                  | OZBOL 3951-22 | Forrest Hill Stn                |
|                  | OZBOL 3956-21 | Hayfield Shenandoah Stn         |
|                  | OZBOL 3957-21 | Hayfield Shenandoah Stn         |
|                  | OZBOL 3958-21 | Hayfield Shenandoah Stn         |
|                  | OZBOL 8190-22 | Forrest Hill Stn                |
|                  | OZBOL 8198-22 | Manbulloo Stn                   |
|                  | OZBOL 8200-22 | Manbulloo Stn                   |
|                  | OZBOL 8201-22 | Manbulloo Stn                   |
|                  | OZBOL 8212-22 | Vermalha Stn                    |
|                  | OZBOL 8213-22 | Vermalha Stn                    |
|                  | OZBOL 8214-22 | Beetaloo Stn                    |
| sp. 21           | OZBOL 8230-22 | Buchanan Downs Stn              |
|                  | OZBOL 8248-22 | Hidden Valley Stn               |
|                  | OZBOL 8249-22 | Hidden Valley Stn               |
|                  | OZBOL 8250-22 | Hidden Valley Stn               |
|                  | OZBOL 8251-22 | Hidden Valley Stn               |
|                  | OZBOL 8254-22 | Shenandoah Stn                  |
|                  | OZBOL 8255-22 | Shenandoah Stn                  |
|                  | OZBOL 8262-22 | Vermalha Stn                    |
|                  | OZBOL 8263-22 | Vermalha Stn                    |

|        |               |                         |
|--------|---------------|-------------------------|
| sp. 22 | OZBOL 8264-22 | Vermalha Stn            |
|        | OZBOL 8271-22 | Vermalha Stn            |
|        | TET 093-17    | Newcastle Waters Stn    |
|        | TET 094-17    | Larrimah                |
|        | TET 083-17    | Manyallaluk             |
| sp. 23 | OZBOL 1860-21 | Kakadu NP               |
| sp. 26 | TET 074-17    | Kakadu NP               |
| sp. 27 | OZBOL 8228-22 | Tandidgee Stn           |
|        | OZBOL 1851-21 | Mataranka Stn           |
|        | OZBOL 1859-21 | Roper Bar               |
|        | OZBOL 3947-21 | Forrest Hill Stn        |
|        | OZBOL 3948-21 | Hayfield Shenandoah Stn |
|        | OZBOL 3949-21 | Forrest Hill Stn        |
|        | OZBOL 3959-21 | Hayfield Shenandoah Stn |
|        | OZBOL 6504-22 | 55 km sw Katherine      |
|        | OZBOL 8191-21 | Powell Creek Stn        |
|        | OZBOL 8192-22 | Manbulloo Stn           |
|        | OZBOL 8193-22 | Manbulloo Stn           |
|        | OZBOL 8194-22 | Manbulloo Stn           |
|        | OZBOL 8195-22 | Manbulloo Stn           |
|        | OZBOL 8197-22 | Manbulloo Stn           |
|        | OZBOL 8199-22 | Manbulloo Stn           |
|        | OZBOL 8202-22 | Manbulloo Stn           |
|        | OZBOL 8204-22 | Manbulloo Stn           |
|        | OZBOL 8205-22 | Manbulloo Stn           |
|        | OZBOL 8207-21 | Powell Creek Stn        |
|        | OZBOL 8208-21 | Powell Creek Stn        |
|        | OZBOL 8209-21 | Powell Creek Stn        |
|        | OZBOL 8210-21 | Powell Creek Stn        |
|        | OZBOL 8211-21 | Powell Creek Stn        |
|        | OZBOL 8215-22 | Beetaloo Stn            |
|        | OZBOL 8216-22 | Beetaloo Stn            |
|        | OZBOL 8219-22 | Newcastle Waters Stn    |
|        | OZBOL 8220-22 | Newcastle Waters Stn    |
|        | OZBOL 8221-22 | Newcastle Waters Stn    |
|        | OZBOL 8224-22 | Tandidgee Stn           |
|        | OZBOL 8231-22 | Amungee Mungee Stn      |
| sp. 28 | OZBOL 8232-22 | Amungee Mungee Stn      |
|        | OZBOL 8233-22 | Amungee Mungee Stn      |
|        | OZBOL 8235-21 | Powell Creek Stn        |
|        | OZBOL 8236-21 | Powell Creek Stn        |
|        | OZBOL 8237-21 | Powell Creek Stn        |
|        | OZBOL 8238-21 | Powell Creek Stn        |
|        | OZBOL 8239-21 | Powell Creek Stn        |
|        | OZBOL 8240-21 | Powell Creek Stn        |
|        | OZBOL 8241-21 | Powell Creek Stn        |
|        | OZBOL 8242-21 | Powell Creek Stn        |
|        | OZBOL 8243-21 | Powell Creek Stn        |
|        | OZBOL 8244-21 | Powell Creek Stn        |

|                          |               |                      |
|--------------------------|---------------|----------------------|
|                          | OZBOL 8245-22 | Hidden Valley Stn    |
|                          | OZBOL 8247-22 | Hidden Valley Stn    |
|                          | OZBOL 8252-22 | Cave Creek Stn       |
|                          | OZBOL 8253-22 | Cave Creek Stn       |
|                          | OZBOL 8256-22 | Shenandoah Stn       |
|                          | OZBOL 8257-22 | Shenandoah Stn       |
|                          | OZBOL 8258-22 | Shenandoah Stn       |
|                          | OZBOL 8259-22 | Shenandoah Stn       |
|                          | OZBOL 8260-22 | Shenandoah Stn       |
|                          | OZBOL 8261-22 | Ucharonidge Stn      |
|                          | OZBOL 8265-22 | Vermalha Stn         |
|                          | OZBOL 8267-22 | Vermalha Stn         |
|                          | OZBOL 8268-22 | Vermalha Stn         |
|                          | OZBOL 8269-22 | Vermalha Stn         |
|                          | OZBOL 8270-22 | Vermalha Stn         |
|                          | TEA 067-17    | Lake Woods           |
|                          | TEA 068-17    | Edith Falls          |
|                          | TET 071-17    | Daly Waters          |
|                          | TET 072-17    | Daly Waters          |
| sp. 29                   | OZBOL 8206-22 | Newcastle Waters Stn |
|                          | OZBOL 8218-22 | Newcastle Waters Stn |
|                          | OZBOL 8246-22 | Hidden Valley Stn    |
| sp. 31                   | OZBOL 8217-22 | Newcastle Waters Stn |
|                          | OZBOL 8225-22 | Tandidgee Stn        |
|                          | OZBOL 8226-22 | Tandidgee Stn        |
|                          | TET 065-17    | Henbury Stn          |
|                          | TET 066-17    | Henbury Stn          |
| <i>T. striolatum</i> gp. | OZBOL 3940-21 | Hayfield Stn, NT     |

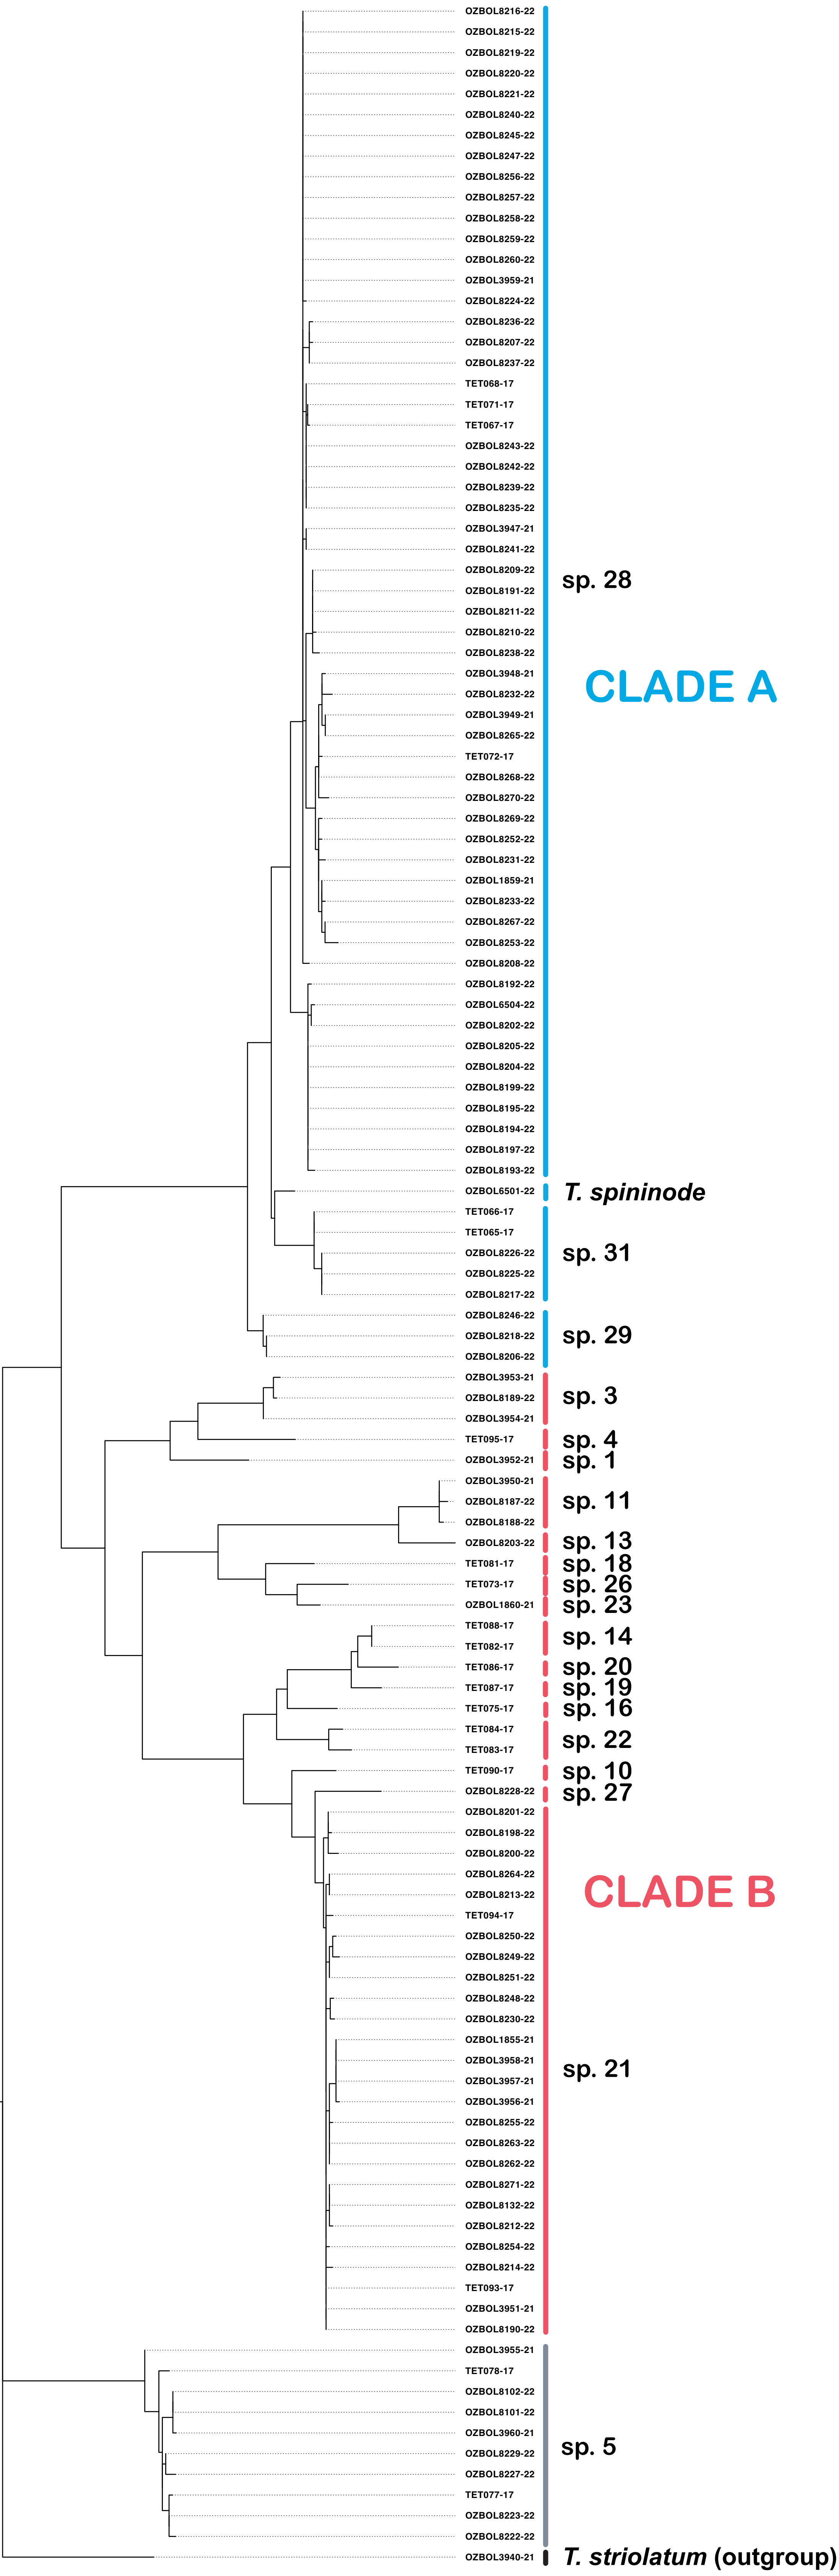

Supplement: s1 [file s1]
